# Supplementary material
Source: PubMed Central journal article supplement (PMC2772825)
Supplement: NIHMS135144-supplement-01.pdf [file NIHMS135144-supplement-01.pdf]

Fig. S1

GCTGGCCGGCTGAATACGGCGCTGGCAAAATGTTGCAAACTCTTAGCAACCATTGTGCGTCCAGTGTCTGATATAATCGGATTC 90  
TACCGATAGGCTCGTTATCTTGTGTACCGCGTGTGTGCGGCGTACGTGTGATGAAAGCGATCGAGCGGCTGTGCGGCATAGTTTGTTC 180  
GAATTCGCTGTAAACATGCTTATGCAATCGCTCTCCGCGCGTGCCTGATGGAGATCCGAGGGCTGCTGATGGGTAGACTACGGTTAGGAC 270  
GGCGGATGGTTCGGTGGTCTGCTCGGCGTGACCGCGTGTACTAATCTGCCACCCTTCGCGTGGTGCAGGGCCGGCACCCAGGAC 360  
-24 M V P L G L L G V T A L L L I L P P F A L V Q G R H H E 4  
TCAACAATGGTGGCCATCGGATCGCATCAGCTGTGCGCTGCCCGGCTGTGGCCTTGCCTCCAGTCCGCCCAGTCCGGATCGTCTG 450  
L N N G A A I G S H Q L S A A A G V G L A S Q S A Q S G S L 34  
CATCCGGTGTGATGTATCCGTTCTGCTGCCGAGCGTATCTCTCTCGTCTGCTGCTGTCATCGTCCAGCCGAGGACGACGTTG 540  
A S G V M S S V P A A G A S S S S S S S S L L S S S A E D D V 64  
CGCGCATTACTCTCAGCAAGGACGCAACGCAATTTTTTACCATATATAGGTACGCGTGGTCCGTACGAATTATAGATGCCGAGTTGG 630  
A R I T L S K D A D A F F T P Y I G H G E S V R I I D A E L 94  
GCACGCTCGAGCATGTCCACAGTGGACAACCGCCGGCGCAGCGGCTGACGAGGCGGAGTCAAACCTCGACCGCAACGACAACGATC 720  
G T L E H V H S G A T P R R R R G L T R R E S N S D A N D N D 124  
CGTGTGGTCAACACGGATAAGGGGCGCATCCGCGCATTACGGTTCGATGCCCGCAGCGGCAAGAAGTGGACGCGTGTGGCTCGGCATTC 810  
P L V V N T D K G R I R G I T V D A P S G K K V D V W L G I 154  
CCTACGCCAGCCCGGTCGGGCCGCTACGGTTCGCTACCGCGCGCGGCAAAAGTGGACCGCGTGTGAACACGACACCCGCGC 900  
P Y A Q P P V G P L R F R H P R P A E K W T G V L N X T T T P 184  
CCAACAGCTGCGTGCAGATCGTGGACACCGTGTTCGGCGACTTCCCGGGCGCACCATGTGGAACCCGAACACGCCCTGTCCGAGGACT 990  
P N S C & V Q I V D T V F G D F P G A T M W + N P N T P L S E D 214  
GTCTGTACATTAACGTGGTGGCACCGCGAACCCCGGCAAGAAATGCGGCGTATGCTGTGGATCTTCGGCGGCGGCTTCTACTCCGGCA 1080  
C & L Y I N V V A P R P R P K N A A V M L W + I F G G G F Y + S G 244  
CCGCCACCCTGGACGTGTACGACCACCGGCGCTTCGCTCGGAGGAGAACGTGATCGTGGTGTGCTGTCAGTACCAGCGTGGCCAGTCTGG 1170  
T A T L D V Y + D H R A L A S E E N V I V V S L Q Y R V A S L 274  
GCTTCTGTTTTCTCGCACCCCGGAAGCGCCGGCAATGCGGACTGTTCGATCAGAACCTTGCCTACCTGGGGTGGGACAAACATTC 1260  
G F L F L G T P E A P G N A G L F D Q N L A L R W V R D N I 304  
ACCGGTTCCGTTGGCGATCCGTCGCGTGTGACACTGTTCGGCGAGAGTCCCGTCCGCTCTCGGTGTGCTGCATCTGCTGTCCGCCCTTT 1350  
H R F G G T D P S R V T L F G E S A G A V S V S L H L S A L 334  
CCCGCATCTGTTCCAGCGGCGCATCTTCAGAGCGGCTCGCCGACGGCACCGTGGGCAATTGGTATCGCGCGAGGAAGCCACACTAAG 1440  
S R D L F Q R A I L Q S G S P T A P W + A L V S R E E A T L R 364  
CACTGCGGTTGGCCGAGGCGGTTCGGTTCGCCGACGAAACCGAGCAAGTGCAGGATCGCGTTCGAGTGCCTGCGCGCAAGGACCCGACG 1530  
A L R L Q A E A V F G C \$ P H E Y T D W T S K L S D A V E C \$ L R G K D P H 394  
TGCTGGTCAACAACGAGTGGGACGCTCGGCATTTGCGAGTTCGCCGTTTCGTCGCGGTTGTCGACGCTGCGTTCCTGGACGAGACGCCG 1620  
V L V N N E W G T L G I C E F + P F + V P V V D G A F L D E T P 424  
AGCGTTCGCTCGCAGCGGCGCTTCAAGAAGACGGAGATCTCTACCCGCGAGCAACCGGAGGAGGGCTACTACTTCACTTCACTTACC 1710  
Q R S L A S G R F F K K T E I L T G S N T E E G Y Y F + I I Y + Y 454  
TGACCGAGCTGCTGCGCAAGGAGGAGGGCGTGACCGTGCAGCGCGAGGAGTTCCTGCAGGCGGTGCGCGAGCTCAACCCGTACGTGAACG 1800  
L T E L L R K E E G V T V T R E E F L Q A V R E L N P Y V N 484  
GGGCGCCCGGCGAGCGATCGTGTTCGAGTACACCGACTGGACCGAGCCGGACAACCCGAACAGCAACCGGGACGCGCTGGACAAGATGG 1890  
G A A R Q A E A V F E Y T D W T A H G R H Y L E L G L N X T S F V 514  
TGGCGACTATCACTTCACTGCAACGTTGACGAGTTCGCGCAGCGGTACGCCGAGGAGGGCAACAACGTTACATGTATCTGTACACCG 1980  
V G D Y H F T C • N V N E F A Q R Y A E E G N N V Y M Y L Y T 544  
ACCGCAGCAAGGCAACCCGTCGGCCGCTGGACGGCGTGTGACGCGGCGAGATCAACTACGTGTTCCGGCAACCCGCTCAACCCCA 2070  
H R S K G N P W + P R W T G V M H G D E I N Y V F G E P L N X P 574  
CCCTCGGCTACACCGAGGACGAGAAAGACTTTAGCCGGAAGATCATGCGATACTGGTCCAACCTTTGCCAAAACCGCAATCCAAATCCCA 2160  
T L G Y T E D E K D F S R K I M R Y W S N F A K T G N P N P 604  
ACACGGCCAGCAGCAATTCGCCGAGTGGCCCAAGCACACCGCCACGGACGACTATCTGGAGCTGGGCTCAACACGTCCTTCGTCG 2250  
N T A S S E F P E W P K H T A H G R H Y L E L G L N X T S F V 634  
GTCGGGCCCCAGGTTGAGGCGTGTGCCTTCTGGAAGAAGTACCTTCCCGAGTGTGACGCTACCTCGAACCTACCAGGGCCAGCAC 2340  
G R G P R L R Q C • A F W K K Y L P Q L V A A T S N L P G P A 664  
CGCCTAGTGAACCGTGCAGAAAGCAGCGCATTTTTTTACCGACCTGATCTGATCGTGTGCTGCTTACGGCGACCGTACAGAT 2430  
P P S E P C # E S S A F F Y R P D L I V L L V S L L T A T V R 694  
TCATACAATAATTACTACCCATCCATGGCTAGTTCGTTAAGCTTTAAGATAGTGAGGAACAAATTTTTCCCAACAATTTTCCCCC 2520  
F I Q \* 697  
TTTAGAGCAGAACCAGGAGAGATAGGACTACATAGCGAAAAGGGAAAAACAAGTGGTGGCGGACGAGGAGAGAAGAAGCAAATCGAATA 2610  
ATCGAAGCAACAACAACAACAACAAAAAATGCAACCCGGTTCACTAAACCCAGGGGCGAGCTCAGTAGCAAACTACTACTTAAATAAC 2700  
TACTTTCTTATGGCAAATATAGGCAAGAGCAGTGTGATGGGTTTCGATCAGTATCCATCTGACCGGAGCAGCTGAACCGTTTCATGGGCA 2790  
GTTGCTGCAATACACCAGACCCGTACACACAGTAACACACTTTTTATAGCTTTACACTAACACCCTCTCCCCAGCTCTCTTCCCC 2880  
TTCCCCCACCACAGACAGCAGCGCCGTTGTAGCAGGATCTACTACCGTCCGTTGGTATGGCGGCAACAACACTAAACACCACACA 2970  
TCTACTAAAACACACCGGAACAATAAACAATGTTAACTTACTATATGAATATACATCTAGACGATATATACGCATGAACACTACTT 3060  
CCCTCGTTCGTGACAAAACACTTACCTTGTCCCCCTCCCCCTCCGTTTGTCTTACCACCTGCACCACCAGTATGAATTTGTTC 3150  
TAATAACGCTTCGTAACCTTACCAGGACACACTGGTTCGTTGGGGAGTGTGCGCGTTCGCTGAAGATGAACTAGCACCG 3240  
CGCACACTTTCGACACGCAACCAAGCTACACATCACGAAAGCAACATCCTGGCCCTATCCGTTTTCTCATTTTAAACTTCTTTCTCT 3330  
AGACAAAACCAACGCAACTAGCAAAAGGTACTTGGTAAACCGGTCAGTACACACTGTGTACAATTGAGCGTAGGGAGGAGTATAA 3420  
TTTCTGAAAATGTATAAAACAAACTAAACAAACTAATTACTTGCAATCCATTCTAAAGCACGAAAACCTCTCAAATAAACGGGA 3510  
AGTAAACAAAAAATCAGAACGAACAATTTACTTAAAAAAGTAAACAAAAAATAAAAAA 3574
